# Supplementary material for: BRG1 Is Dispensable for Sertoli Cell Development and Functions in Mice
Source: MDPI journal article supplement (doi:10.3390/ijms21124358), 2020-06-19
Supplement: s1 [file s1]

## **BRG1 is dispensable for Sertoli cell development and functions in mice**

Shuai Wang<sup>1</sup>, Pengxiang Wang<sup>1</sup>, Dongli Liang<sup>1\*</sup> and Yuan Wang<sup>2\*</sup>

<sup>1</sup> Shanghai Key Laboratory of Regulatory Biology, Institute of Biomedical Sciences and School of Life Sciences, East China Normal University, Shanghai, 200241, China

<sup>2</sup> Department of Animal Sciences, College of Agriculture and Natural Resources, Michigan State University, East Lansing, MI 48824, USA

\* To whom correspondence should be addressed:

Yuan Wang, Department of Animal Sciences, College of Agriculture and Natural Resources, Michigan State University, East Lansing, USA, 48824

Email: [wangyu81@msu.edu](mailto:wangyu81@msu.edu)

Dongli Liang, School of Life Sciences, East China Normal University, Shanghai, China, 200241

Email: [dliliang@bio.ecnu.edu.cn](mailto:dliliang@bio.ecnu.edu.cn)

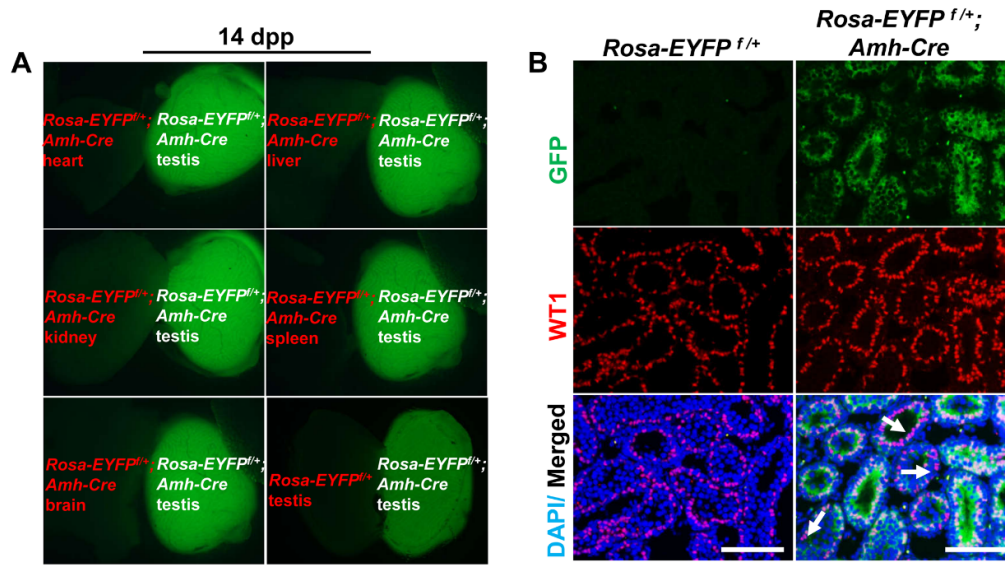

**Figure S1. Specific but inefficient CRE recombinase activity in *Amh-Cre* mice from Jackson Lab.**

(A) GFP fluorescence in different organs from *Rosa-EYFP<sup>f/+</sup>; Amh-Cre* and *Rosa-EYFP<sup>f/+</sup>* mice.

(B) GFP and WT1 expression was examined with IHF in testes from *Rosa-EYFP<sup>f/+</sup>; Amh-Cre* and *Rosa-EYFP<sup>f/+</sup>* mice. CRE in Sertoli cells excised the strong transcriptional termination sequence (triple SV40 polyadenylation sequence) before *EYFP* coding sequences, which led to expression of EYFP (detected by a GFP antibody because of high homologous sequences between GFP and EYFP proteins). GFP protein was not expressed in a fraction of Sertoli cells (white arrows), suggesting that *Amh-Cre* recombinase activity was inefficient. Scale bars, 200  $\mu$ m.

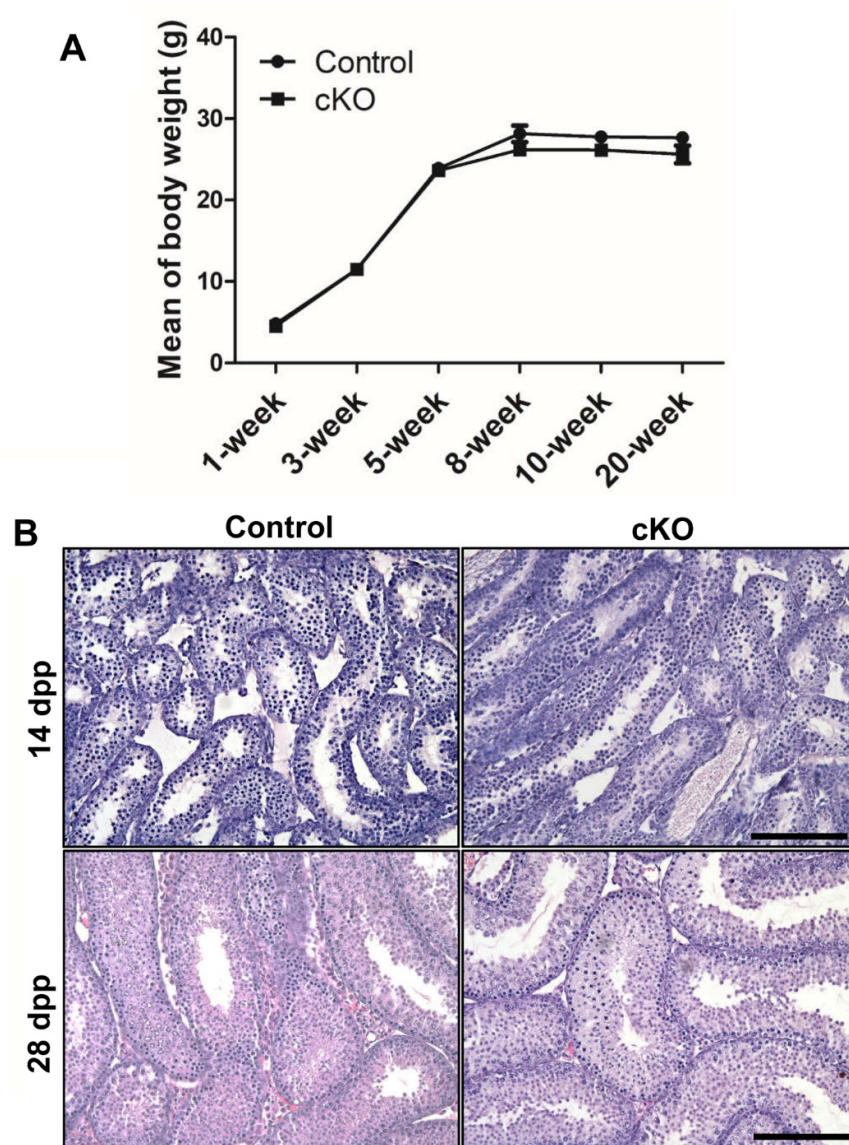

**Figure S2. Normal spermatogenesis and body weights upon partial *Brg1* deletion in Sertoli cells mediated by *Amh-Cre* (Jackson).**

(A) Mean body weight of mice at different ages, body weights were recorded for 3–10 animals per group. Error bars represent  $\pm$  SEM. Statistical analyses were performed using Student's t-test. (B) Histology study on testes from control and *Brg1*-cKO mice at 14 dpp and 28 dpp. Normal spermatogenesis and germ cell layout in seminiferous tubules were observed in control and cKO testes. Scale bars, 200  $\mu$ m.

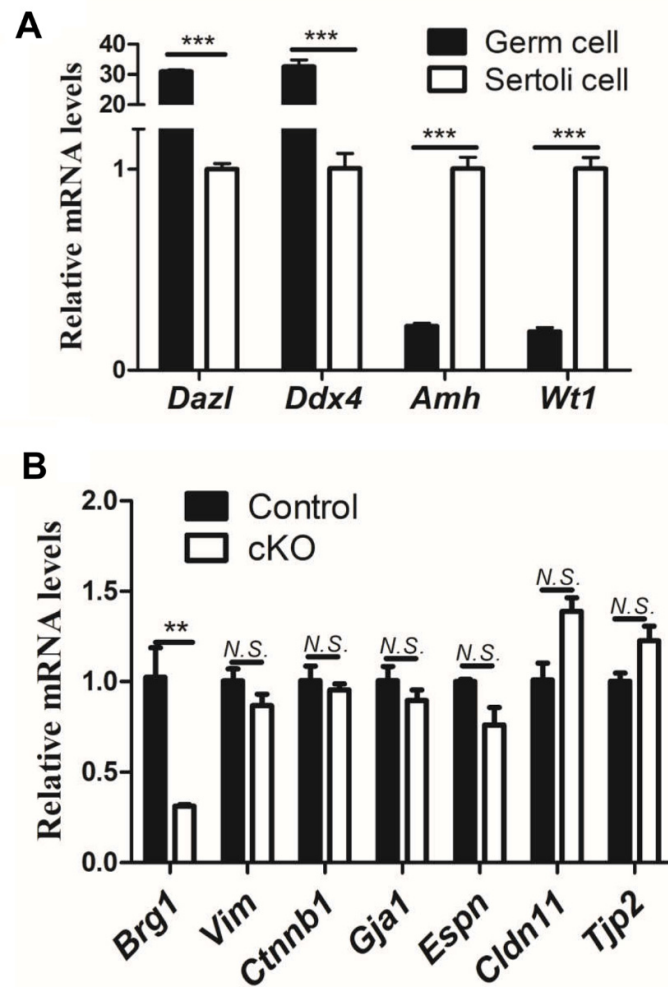

**Figure S3. High purity of the isolated Sertoli cells and BTB related-gene expression analyses.**

(A) Expression levels of germ cell markers (*Dazl* and *Ddx4*) and Sertoli cell genes (*Amh* and *Wt1*) were examined by real-time RT-PCR in isolated germ cells from 14 dpp wildtype mice. Gene expression was normalized to *Gapdh* and relative expression levels were calculated to those from Sertoli cells.

(B) *Brg1* and BTB related-genes (*Vim*, *Ctnnb1*, *Gja1*, *Cldn11*, *Tjp2* and *Espn*) were determined for their transcript levels by real-time RT-PCR in isolated Sertoli cells from 14 dpp control and cKO mice. Gene expression was normalized to *Gapdh* and calculated relatively to *Brg1<sup>fl/fl</sup>* control group.

(A-B) Data are presented as mean  $\pm$  SEM from three independent experiments. Statistical analyses were performed using Student's t-test. \*\*:  $p < 0.01$ ; \*\*\*:  $p < 0.001$ ; N.S.: no significance.

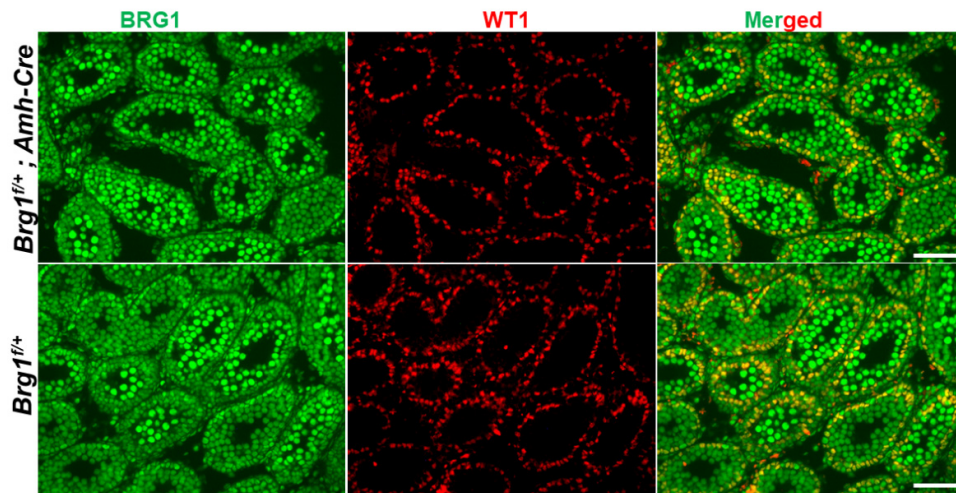

**Figure S4. Heterozygote deletion of *Brg1* does not affect its expression in Sertoli cells and germ cells.**

IHF were performed with BRG1 and WT1 antibodies on testis sections from wild-type mice or mice with heterozygote *Brg1* deletion in Sertoli cells mediated by *Amh-Cre* (EMMA). No obvious alteration was observed in spermatogenesis and in expression of WT1 and BRG1 from mice upon heterozygote *Brg1* deletion in Sertoli cells. Scale bars, 100  $\mu$ m.

**Table S1. Primers used in genotyping**

| Gene name               | Forward primers             | Reverse primers             | Amplicon Size                      |
|-------------------------|-----------------------------|-----------------------------|------------------------------------|
| <i>Brg1</i>             | GTCATACTTATGT<br>CATAGCC    | GCCTTGTCTCAAA<br>CTGATAAG   | Homozygous:380bp<br>Wildtype:250bp |
| <i>Amh</i><br>(Jackson) | GCGGTCTGGCAGT<br>AAAAACTATC | GTGAAACAGCATT<br>GCTGTCACTT | 100bp                              |
| <i>Amh</i><br>(EMMA)    | TCCTGGAAAATGC<br>TTCTGTCCG  | CAGGGTGTATAA<br>GCAATCCC    | 400bp                              |

**Table S2. Primers used in real-time PCR**

| Gene name                 | Forward primers                             | Reverse primers                                     |
|---------------------------|---------------------------------------------|-----------------------------------------------------|
| <i>Brg1</i><br><i>Brm</i> | GGTTCTGCCACAGCATGAT<br>CTCCTGGACCAATTCTGGGG | GGACTCCATAGGCTTGTGCAT<br>CATCGTTGACAGAGGATGTG<br>AG |

|               |                             |                             |
|---------------|-----------------------------|-----------------------------|
| <i>Dazl</i>   | ATGTCTGCCACAACCTCTGAG       | CTGATTTCGGTTTCATCCATC<br>CT |
| <i>Ddx4</i>   | GCTTCATCAGATATTGGCGAG<br>T  | GCTTGGAAAACCCTCTGCTT        |
| <i>Plzf</i>   | CTGCGGAAAACGGTTCCTG         | GTGCCAGTATGGGTCTGTCT        |
| <i>Gfra1</i>  | CACTCCTGGATTTGCTGATGT       | AGTGTGCGGTACTTGGTGC         |
| <i>Sycp3</i>  | AGCCAGTAACCAGAAAATTGA<br>GC | CCACTGCTGCAACACATTCAT<br>A  |
| <i>Stra8</i>  | ACAACCTAAGGAAGGCAGTTT<br>AC | GACCTCCTCTAAGCTGTTGGG       |
| <i>Kit</i>    | GCCACGTCTCAGCCATCTG         | GTCGCCAGCTTCAACTATTAA<br>CT |
| <i>Tnp1</i>   | ACCAGCCGCAAGCTAAAGAC        | TTTCCTACTTTTCAGGACGCT<br>C  |
| <i>Prm1</i>   | CCGTCGCAGACGAAGATGTC        | CACCTTATGGTGTATGAGCGG       |
| <i>Amh</i>    | CCACACCTCTCTCCACTGGTA       | GGCACAAAGGTTCAAGGGGG        |
| <i>Wtl</i>    | GAGAGCCAGCCTACCATCC         | GGGTCCTCGTGTTTGAAGGAA       |
| <i>Vim</i>    | CGGCTGCGAGAGAAATTGC         | CCACTTTCGGTTCAAGGTCAA<br>G  |
| <i>Ctnnb1</i> | ATGGAGCCGGACAGAAAAGC        | CTTGCCACTCAGGGAAGGA         |
| <i>Gja1</i>   | ACAGCGGTTGAGTCAGCTTG        | GAGAGATGGGGAAGGACTTG<br>T   |
| <i>Espn</i>   | CCACAGGCTACCTCTCTTGC        | AGCAGCCACTTCACCACATC        |
| <i>Cldn11</i> | ATGGTAGCCACTTGCCTTCAG       | AGTTCGTCCATTTTTCGGCAG       |
| <i>Tjp2</i>   | ATGGGAGCAGTACACCGTGA        | TGACCACCCTGTCATTTTCTT<br>G  |
| <i>Gapdh</i>  | AGGTCGGTGTGAACGGATTTG       | TGTAGACCATGTAGTTGAGGT<br>CA |
